# Supplementary material
Source: PubMed Central journal article supplement (PMC5916034)

## A Mathematical Model for Predicting Obesity Transmission With Both Genetic and Nongenetic Heredity

Keisuke Ejima, Diana Thomas, David B. Allison

Department of Epidemiology and Biostatistics, School of Public Health, Indiana University –  
Bloomington, IN, USA.

[kejima@iu.edu](mailto:kejima@iu.edu)

### *Obesity epidemic model*

As in **Figure 1** in the main text, the proportions of the population with and without obesity differed by genotype and are described by ordinary differential equations as follows:

$$\begin{aligned} \frac{dS_{aa}(t)}{dt} = & \underbrace{\nu(1 - k_1)c_a \left( S_{aa} + \frac{S_{Aa}}{2} \right)}_{\text{children born without obesity from the combination of}} + \\ & \text{paternal allele } a \text{ and maternal (without obesity) allele } a \\ & \underbrace{\nu(1 - k_2)c_a \left( I_{aa} + \frac{I_{Aa}}{2} \right)}_{\text{children born without obesity from the combination of}} - \\ & \text{paternal allele } a \text{ and maternal (with obesity) allele } a \\ & \underbrace{(\beta_{aa}I + \eta_{aa})S_{aa}}_{\text{progression to obesity}} - \underbrace{\mu S_{aa}}_{\text{natural death}} \quad (A1) \\ & (S_{aa} \rightarrow I_{aa}) \end{aligned}$$

$$\begin{aligned} \frac{dI_{aa}(t)}{dt} = & \underbrace{\nu k_1 c_a \left( S_{aa} + \frac{S_{Aa}}{2} \right)}_{\text{children born with obesity from the combination of}} + \\ & \text{paternal allele } a \text{ and maternal (without obesity) allele } a \\ & \underbrace{\nu k_2 c_a \left( I_{aa} + \frac{I_{Aa}}{2} \right)}_{\text{children born with obesity from the combination of}} + \underbrace{(\beta_{aa}I + \eta_{aa})S_{aa}}_{\text{progression to obesity}} - \\ & \text{paternal allele } a \text{ and maternal (with obesity) allele } a \quad (S_{aa} \rightarrow I_{aa}) \\ & \underbrace{d_{aa}I_{aa}}_{\text{natural death and death due to obesity}} \quad (A2) \end{aligned}$$

$$\frac{dS_{Aa}(t)}{dt} = \underbrace{\nu(1 - k_1)c_A \left( S_{aa} + \frac{S_{Aa}}{2} \right)}_{\text{children born without obesity from the combination of paternal allele } A \text{ and maternal (without obesity) allele } a} +$$

$$\underbrace{\nu(1 - k_2)c_A \left( I_{aa} + \frac{I_{Aa}}{2} \right)}_{\text{children born without obesity from the combination of paternal allele } A \text{ and maternal (with obesity) allele } a} +$$

$$\underbrace{\nu(1 - k_1)c_a \left( S_{AA} + \frac{S_{Aa}}{2} \right)}_{\text{children born without obesity from the combination of paternal allele } a \text{ and maternal (without obesity) allele } A} +$$

$$\underbrace{\nu(1 - k_2)c_a \left( I_{AA} + \frac{I_{Aa}}{2} \right)}_{\text{children born without obesity from the combination of paternal allele } a \text{ and maternal (with obesity) allele } A} -$$

$$\underbrace{(\beta_{Aa}I + \eta_{Aa})S_{Aa}}_{\text{progression to obesity } (S_{Aa} \rightarrow I_{Aa})} - \underbrace{\mu S_{Aa}}_{\text{natural death}} \quad (\text{A3})$$

$$\frac{dI_{Aa}(t)}{dt} = \underbrace{\nu k_1 c_A \left( S_{aa} + \frac{S_{Aa}}{2} \right)}_{\text{children born with obesity from the combination of paternal allele } A \text{ and maternal (without obesity) allele } a} +$$

$$\underbrace{\nu k_2 c_A \left( I_{aa} + \frac{I_{Aa}}{2} \right)}_{\text{children born with obesity from the combination of paternal allele } A \text{ and maternal (with obesity) allele } a} +$$

$$\underbrace{\nu k_1 c_a \left( S_{AA} + \frac{S_{Aa}}{2} \right)}_{\text{children born with obesity from the combination of paternal allele } a \text{ and maternal (without obesity) allele } A} +$$

$$\underbrace{\nu k_2 c_a \left( I_{AA} + \frac{I_{Aa}}{2} \right)}_{\text{children born with obesity from the combination of paternal allele } a \text{ and maternal (with obesity) allele } A} + \underbrace{(\beta_{Aa} I + \eta_{Aa}) S_{Aa}}_{\text{progression to obesity } (S_{Aa} \rightarrow I_{Aa})} - \underbrace{d_{Aa} I_{Aa}}_{\text{natural death and death due to obesity}} \quad (\text{A4})$$

$$\begin{aligned} \frac{dS_{AA}(t)}{dt} = & \underbrace{\nu(1 - k_1) c_A \left( S_{AA} + \frac{S_{Aa}}{2} \right)}_{\text{children born without obesity from the combination of paternal allele } A \text{ and maternal (without obesity) allele } A} + \\ & \underbrace{\nu(1 - k_2) c_A \left( I_{AA} + \frac{I_{Aa}}{2} \right)}_{\text{children born without obesity from the combination of paternal allele } A \text{ and maternal (with obesity) allele } A} - \\ & \underbrace{(\beta_{AA} I + \eta_{AA}) S_{AA}}_{\text{progression to obesity } (S_{AA} \rightarrow I_{AA})} - \underbrace{\mu S_{AA}}_{\text{natural death}} \quad (\text{A5}) \end{aligned}$$

$$\begin{aligned} \frac{dI_{AA}(t)}{dt} = & \underbrace{\nu k_1 c_A \left( S_{AA} + \frac{S_{Aa}}{2} \right)}_{\text{children born with obesity from the combination of paternal allele } A \text{ and maternal (without obesity) allele } A} + \\ & \underbrace{\nu k_2 c_A \left( I_{AA} + \frac{I_{Aa}}{2} \right)}_{\text{children born with obesity from the combination of paternal allele } A \text{ and maternal (with obesity) allele } A} + \underbrace{(\beta_{AA} I + \eta_{AA}) S_{AA}}_{\text{progression to obesity } (S_{AA} \rightarrow I_{AA})} - \underbrace{d_{AA} I_{AA}}_{\text{natural death and death due to obesity}} \quad (\text{A6}) \end{aligned}$$

where  $S_{ij}(t)$  and  $I_{ij}(t)$  denote the proportions of the population without and with obesity differed by genotype  $ij$  at year  $t$ , respectively. The frequency of each allele,  $c_a$  and  $c_A$ , is

described by  $N_{ij}$  as follows:  $c_a = N_{aa} + \frac{N_{Aa}}{2}$ ,  $c_A = N_{AA} + \frac{N_{Aa}}{2}$ . **Figure 1** shows the schematic illustration of the transition between the populations.

### ***Time-dependent dynamics of the genotype distribution***

Assuming the mortality rate for people with obesity is same as that for people without obesity, and it is the same as the birth rate ( $\nu = \mu$ ), the time-dependent dynamics of the genotype distribution,  $N_{aa}$ ,  $N_{Aa}$ ,  $N_{AA}$ , can be written by three ordinary differential equations:

$$\frac{dN_{aa}(t)}{dt} = \mu \left( N_{aa} + \frac{N_{Aa}}{2} \right)^2 - \mu N_{aa} \quad (\text{A7})$$

$$\frac{dN_{Aa}(t)}{dt} = 2\mu \left( N_{AA} + \frac{N_{Aa}}{2} \right) \left( N_{aa} + \frac{N_{Aa}}{2} \right) - \mu N_{Aa} \quad (\text{A8})$$

$$\frac{dN_{AA}(t)}{dt} = \mu \left( N_{AA} + \frac{N_{Aa}}{2} \right)^2 - \mu N_{AA} \quad (\text{A9})$$

where  $N_{aa} + N_{Aa} + N_{AA} = 1$ . The fixed point of this system can be solved by setting all the equation equal to zero:  $(N_{aa}^*, N_{Aa}^*, N_{AA}^*) = (x, 1 + x - 2\sqrt{x}, 2\sqrt{x} - 2x)$ .

$x$  can take 0 to 1, which means the fixed point depends on the initial genotype distribution.

Similarly, time-dependent dynamics of the proportion of the hypothetical obesogenic gene,

$c_A = N_{AA} + \frac{N_{Aa}}{2}$ , is derived by using equations (A7)-(A9);

$$\frac{dc_A(t)}{dt} = 0 \quad (\text{A10})$$

which means the proportion of the hypothetical obesogenic gene among the population is time constant.

### ***Drop socially contagious risk and genetic effect***

Hereafter, we drop the socially contagious risk ( $\beta = 0$ ) and genetic effect (assume  $\eta_{aa} = \eta_{Aa} = \eta_{AA}$ ) from the model. Then the difference from genotype disappears and the model can be reduced and solved as follows:

$$\begin{pmatrix} S' \\ I' \end{pmatrix} = M \begin{pmatrix} S \\ I \end{pmatrix} \quad (\text{A11})$$

$$M = \begin{pmatrix} -\mu - \eta + v(1 - k_1) & v(1 - k_2) \\ \eta + vk_1 & -\mu + vk_2 \end{pmatrix} \quad (\text{A12})$$

$$\begin{pmatrix} S \\ I \end{pmatrix} = f_1 e^{(v(k_2 - k_1) - \mu - \eta)t} \begin{pmatrix} 1 \\ -1 \end{pmatrix} + f_2 e^{(v - \mu)t} \begin{pmatrix} 1 \\ \frac{vk_1 + \eta}{v(1 - k_2)} \end{pmatrix} \quad (\text{A13})$$

As  $-\mu + v$  is the largest eigenvalue, the 2<sup>nd</sup> term in equation (A13) is dominant, so the converged prevalence can be written as follows:

$$\frac{vk_1 + \eta}{v(1 - k_2) + vk_1 + \eta} \quad (\text{A14})$$

Now, using this equation, we assess the sensitivity of the obesity prevalence on the parameters. The best fit parameter set in **Table 2** is used as the baseline value. First, we see the sensitivity of the prevalence on phenotypic (nongenetic) transmission by changing  $k_2$  (**Figure S1**). As  $k_2$  increases, the obesity prevalence goes up, but the impact is quite limited. **Figure S2** shows the sensitivity on spontaneous weight gain rate  $\eta$ . As  $\eta$  goes up, the prevalence increases. **Figure S3** shows the sensitivity on  $v$ . As  $v$  goes up, the prevalence decreases.

## *Computational code for the obesity epidemic model (R code)*

```

##library to solve differential equation##
library(deSolve)
##define the obesity epidemic model##
si <- function(time, y, parameters) {
  with(as.list(c(y, parameters)), {
    mu=0.0144; d_aa=mu; d_Aa=mu; d_AA=mu; nu=mu
    Naa=Saa+Iaa
    NAa=SAa+IAa
    NAA=SAA+IAA
    I=Iaa+IAa+IAA
    ca = (2*Naa+NAa) / 2
    cA = (2*NAA+NAa) / 2
    dSaa <- nu*ca*((1-k1)*(Saa+SAa/2) + (1-k2)*(Iaa+IAa/2)) -
(beta_aa*I+eta_aa+mu)*Saa
    dIaa <- nu*ca*(k1*(Saa+SAa/2) + k2*(Iaa+IAa/2)) + (beta_aa*I+eta_aa)*Saa
- d_aa*Iaa
    dSAa <- nu*ca*((1-k1)*(SAA+SAa/2) + (1-k2)*(IAA+IAa/2)) + nu*cA*((1-
k1)*(Saa+SAa/2) + (1-k2)*(Iaa+IAa/2)) - (beta_Aa*I+eta_Aa+mu)*SAa
    dIAa <- nu*ca*(k1*(SAA+SAa/2) + k2*(IAA+IAa/2)) +
nu*cA*(k1*(Saa+SAa/2) + k2*(Iaa+IAa/2)) + (beta_Aa*I+eta_Aa)*SAa - d_Aa*IAa
    dSAA <- nu*cA*((1-k1)*(SAA+SAa/2) + (1-k2)*(IAA+IAa/2)) -
(beta_AA*I+eta_AA+mu)*SAA
    dIAA <- nu*cA*(k1*(SAA+SAa/2) + k2*(IAA+IAa/2)) +
(beta_AA*I+eta_AA)*SAA - d_AA*IAA
    list(c(dSaa, dIaa, dSAa, dIAa, dSAA, dIAA))
  })
}
##solve ODE model##
start=1988
times <- seq(start, start+200)
parameters <- c(k1=0, k2=0.070521963, beta_aa=0.004556391, beta_Aa=0.004556391,
beta_AA=0.284332946, eta_aa=0.000792872, eta_Aa=0.000792872, eta_AA=0.023607965)
init <- c(Saa=0.78*0.34, Iaa=0.22*0.34,
          SAa=0.78*0.46, IAa=0.22*0.46,
          SAA=0.78*0.20, IAA=0.22*0.20)
out <- as.data.frame(ode(y = init, times = times, func = si, parms = parameters))
out$time=seq(start, start+200)
##draw figure##
plot(out$time,(out$Iaa+out$IAa+out$IAA)*100,axes=FALSE,xlab="year",ylab="proportion
of population with obesity (%)",xlim=c(start, start+200),ylim=c(0,50),lty=1,bty = "l",
col=1,type="l")
par(new=T)
plot(c(start,start+11,start+19),c(22,30,32),axes=FALSE,xlab="",ylab="",xlim=c(start,
start+200),ylim=c(0,50),lty="blank",pch=16,col=1)
axis(side=1,at=c(seq(1990,2190,by=10)), tcl = -0.3, pos=0)
axis(side=2,at=seq(0,50,10), tcl = -0.5, las=1, pos=1988)

```

## Tables

Table S1. Key assumptions relevant to the intergenerational transmission of obesity

| Key assumptions                                                                                                                                                                                                    | Supportive reference | Unsupportive reference |
|--------------------------------------------------------------------------------------------------------------------------------------------------------------------------------------------------------------------|----------------------|------------------------|
| Obesity risk is dependent on prevalence of obesity (social contagion).                                                                                                                                             | 1                    |                        |
| Susceptibility to obesity differs by genotype.                                                                                                                                                                     | 2,3                  |                        |
| Maternal obesity has a causal effect on the risk that a child is born as obese (phenotypic transmission).                                                                                                          | 4                    | 5-7                    |
| There is no assortative mating for BMI; i.e., the probability distribution of male BMI conditional on female mating-partner BMI is constant across the distribution of female mating-partner BMI (and vice versa). |                      | 8                      |
| Realized fertility is not associated with maternal obesity.                                                                                                                                                        |                      | 9-11                   |
| Genes and environment don't interact with each other on progression to obesity.                                                                                                                                    |                      | 12                     |
| Paternal obesity does not have a causal effect on the probability of offspring obesity in childhood.                                                                                                               |                      | 13,14                  |
| Role of mother on offspring obesity is the same as that of father except phenotypic transmission.                                                                                                                  |                      | 15                     |
| Mortality risk is independent from BMI.                                                                                                                                                                            |                      | 16                     |
| Spontaneous weight gain risk is fixed over time                                                                                                                                                                    |                      |                        |

## References

1. Christakis NA, Fowler JH. The spread of obesity in a large social network over 32 years. *N Engl J Med*. 2007;357(4):370-379.
2. Qi L, Kang K, Zhang C, et al. Fat mass-and obesity-associated (FTO) gene variant is associated with obesity: longitudinal analyses in two cohort studies and functional test. *Diabetes*. 2008;57(11):3145-3151.
3. Hinney A, Nguyen TT, Scherag A, et al. Genome wide association (GWA) study for early onset extreme obesity supports the role of fat mass and obesity associated gene (FTO) variants. *PLoS One*. 2007;2(12):e1361.
4. Li CC, Young PE, Maloney CA, et al. Maternal obesity and diabetes induces latent metabolic defects and widespread epigenetic changes in isogenic mice. *Epigenetics*. 2013;8(6):602-611.
5. Ajslev TA, Angquist L, Silventoinen K, Baker JL, Sorensen TI. Stable intergenerational associations of childhood overweight during the development of the obesity epidemic. *Obesity (Silver Spring)*. 2015;23(6):1279-1287.

6. Fleten C, Nystad W, Stigum H, et al. Parent-offspring body mass index associations in the Norwegian Mother and Child Cohort Study: a family-based approach to studying the role of the intrauterine environment in childhood adiposity. *Am J Epidemiol.* 2012;176(2):83-92.
7. Sørensen TI, Ajslev TA, Ångquist L, Morgen CS, Ciuchi IG, Davey Smith G. Comparison of associations of maternal peri-pregnancy and paternal anthropometrics with child anthropometrics from birth through age 7 y assessed in the Danish National Birth Cohort. *The American Journal of Clinical Nutrition.* 2016;104(2):389-396.
8. Allison DB, Neale MC, Kezis MI, Alfonso VC, Heshka S, Heymsfield SB. Assortative mating for relative weight: genetic implications. *Behav Genet.* 1996;26(2):103-111.
9. Bastian LA, West NA, Corcoran C, Munger RG, Cache County Study on Memory H, Aging. Number of children and the risk of obesity in older women. *Prev Med.* 2005;40(1):99-104.
10. Rosenberg L, Palmer JR, Wise LA, Horton NJ, Kumanyika SK, Adams-Campbell LL. A prospective study of the effect of childbearing on weight gain in African-American women. *Obes Res.* 2003;11(12):1526-1535.
11. Weng HH, Bastian LA, Taylor DH, Jr., Moser BK, Ostbye T. Number of children associated with obesity in middle-aged women and men: results from the health and retirement study. *J Womens Health (Larchmt).* 2004;13(1):85-91.
12. Qi L, Cho YA. Gene-environment interaction and obesity. *Nutr Rev.* 2008;66(12):684-694.
13. Fullston T, Ohlsson Teague EM, Palmer NO, et al. Paternal obesity initiates metabolic disturbances in two generations of mice with incomplete penetrance to the F2 generation and alters the transcriptional profile of testis and sperm microRNA content. *FASEB J.* 2013;27(10):4226-4243.
14. Rando OJ. Daddy issues: paternal effects on phenotype. *Cell.* 2012;151(4):702-708.
15. Jimenez-Chillaron JC, Isganaitis E, Charalambous M, et al. Intergenerational transmission of glucose intolerance and obesity by in utero undernutrition in mice. *Diabetes.* 2009;58(2):460-468.
16. Flegal KM, Kit BK, Orpana H, Graubard BI. Association of all-cause mortality with overweight and obesity using standard body mass index categories: a systematic review and meta-analysis. *JAMA.* 2013;309(1):71-82.



## Figure Legends

**Figure S1: Sensitivity of obesity prevalence on phenotypic (nongenetic) transmission of obesity.**

The gray vertical line represents the baseline value of  $k_2$ .

**Figure S2: Sensitivity of obesity prevalence on spontaneous weight gain rate.**

The gray vertical line represents the baseline value of  $\eta$ .

**Figure S3: Sensitivity of obesity prevalence on birth rate.**

The gray vertical line represents the baseline value of  $\nu$ .

**Figure S4: Proportion of the population with obesity attributable to social contagious risk factors among the newly diagnosed cases (incidence) of obesity.**

Obesity risk consists of spontaneous weight gain risk and social contagious risk after birth.

The line shows the time course change in the proportion of new cases of obesity due to the social contagious risk factor.

# Figures

Figure S1

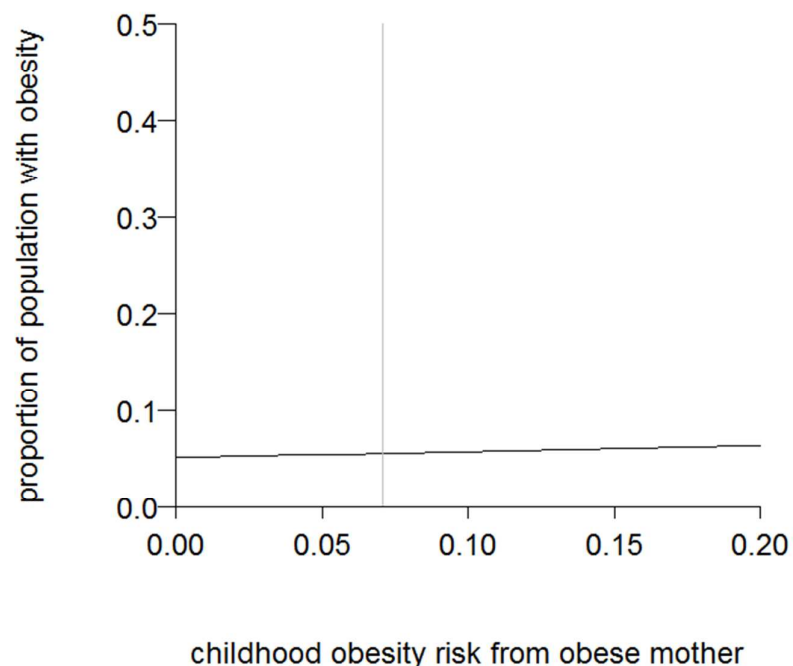

Figure S2

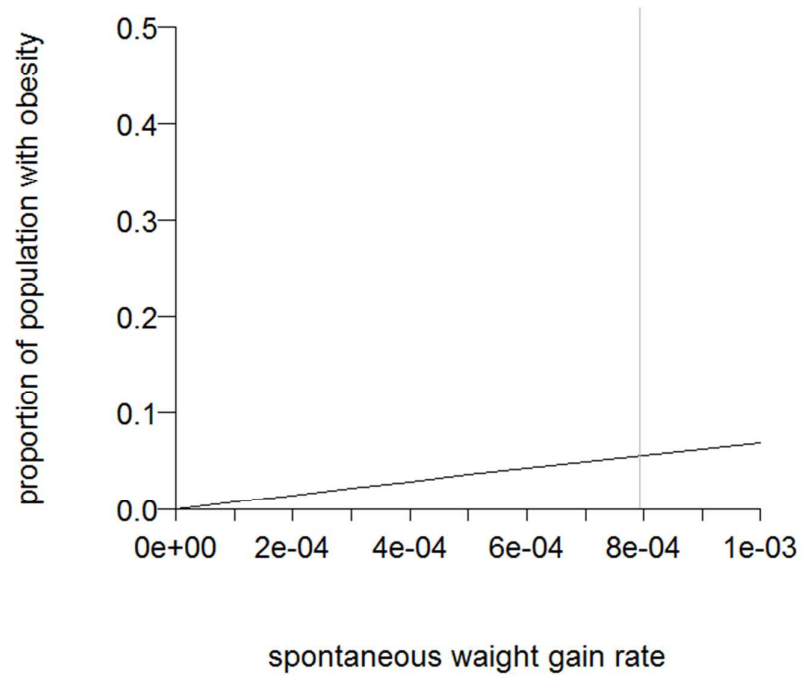

Figure S3

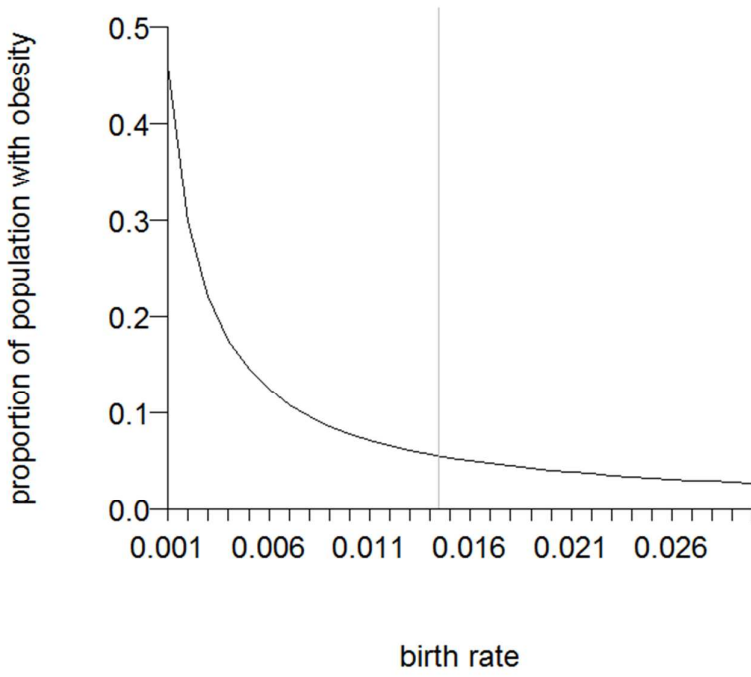

Figure S4

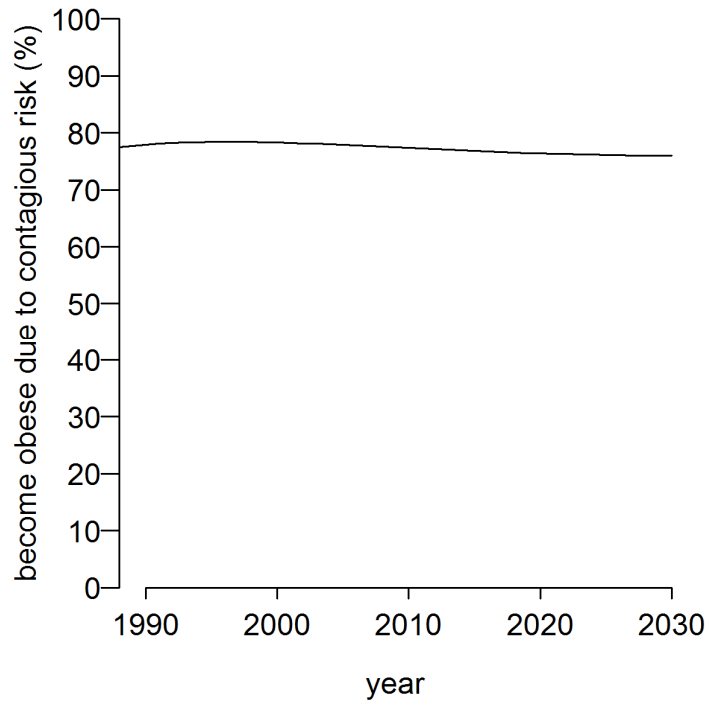

Supplement: NIHMS937127-supplement-supplement_1.pdf [file NIHMS937127-supplement-supplement_1.pdf]
